# Supplementary material
Source: PubMed Central journal article supplement (PMC7501188)

**Supplementary Figure 1:** Figure shows uncropped images of all blots presented in the main paper and Extended Data. Red boxes indicate the cropped regions. Molecular weight markers are indicated in kDa.

**Figure 1b**

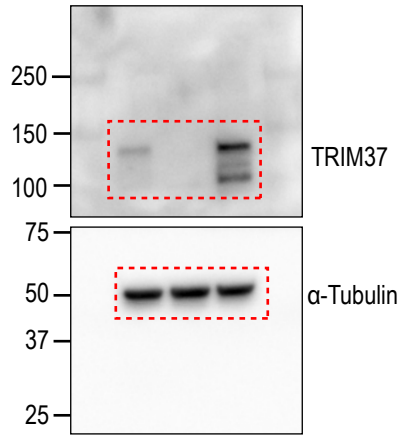

**Figure 1f**

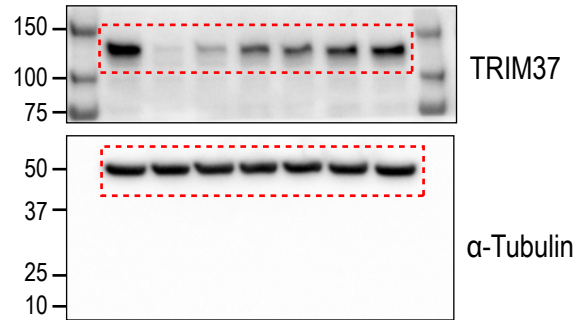

**Figure 2b & Extended Data Figure 3b (upper panel)**

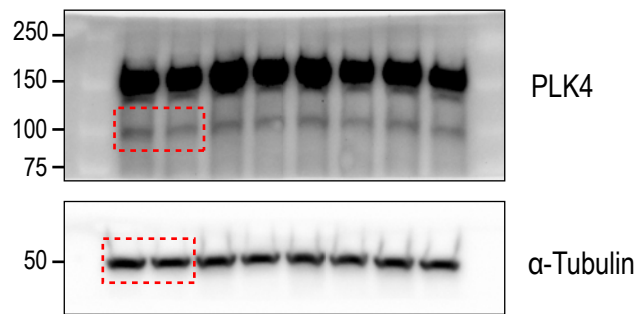

**Figure 2i**

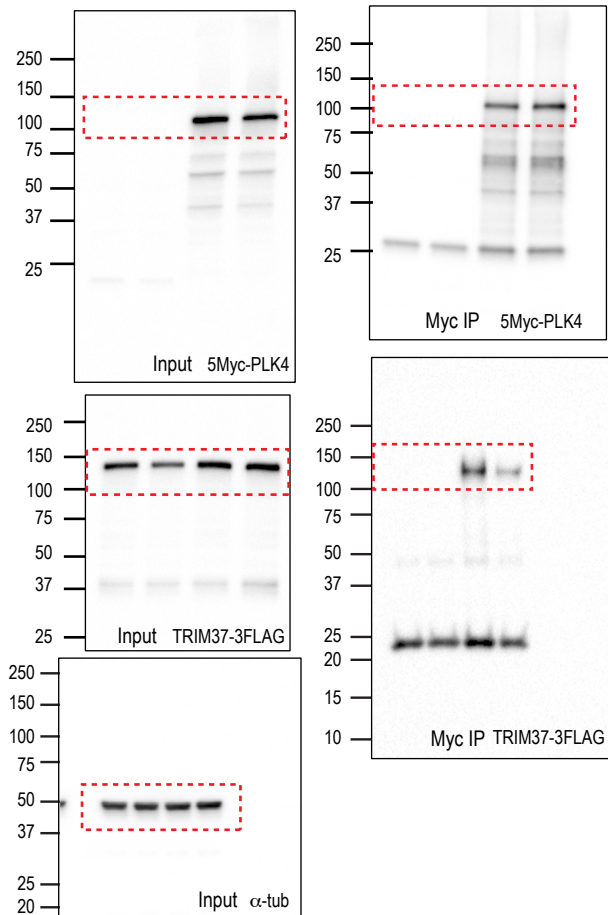

**Figure 2j**

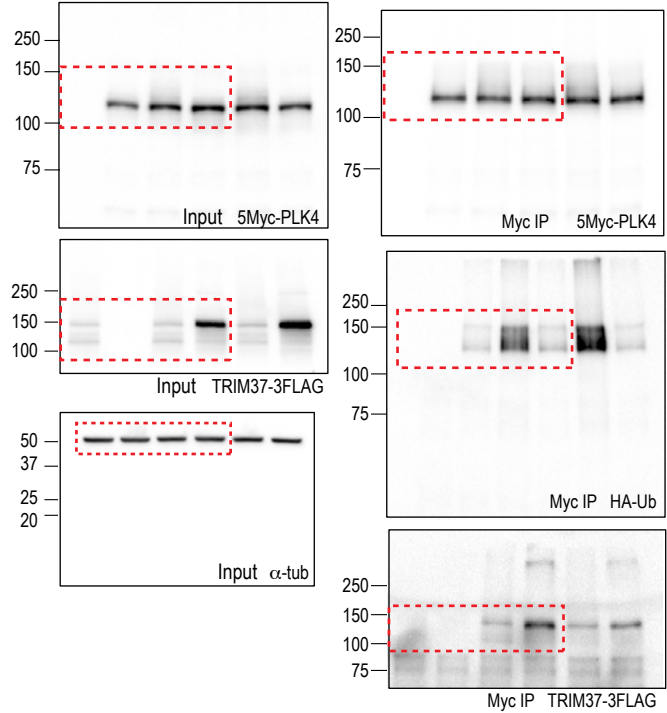

**Figure 3f**

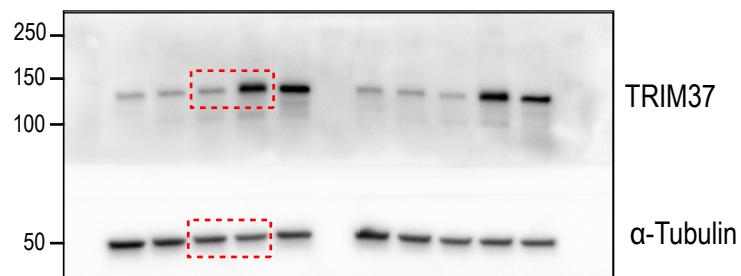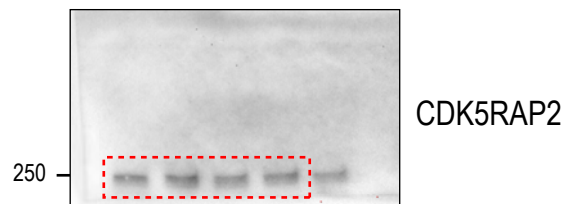

**Figure 3g**

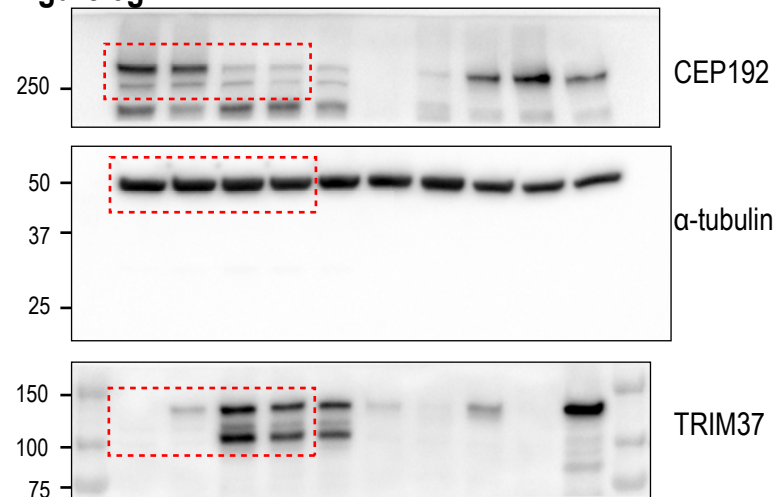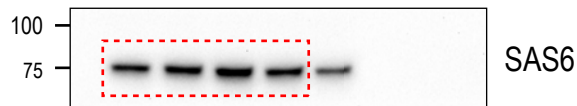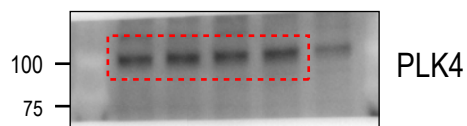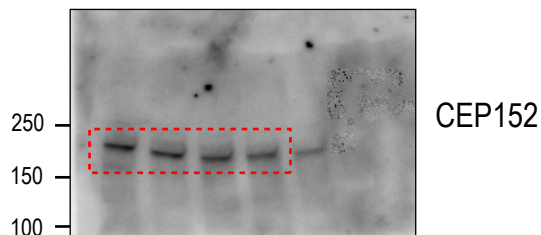

**Figure 4b**

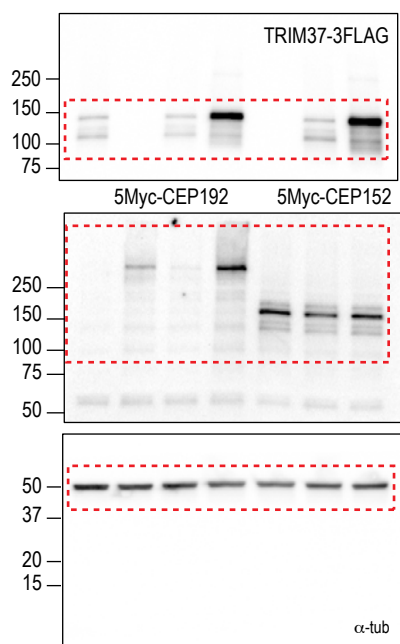

**Figure 4c**

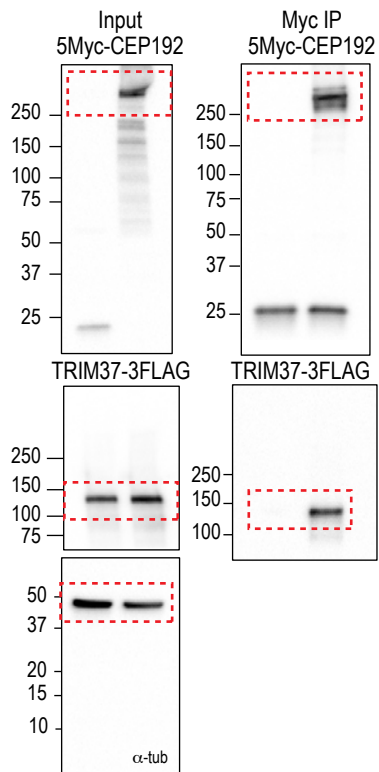

**Figure 4d**

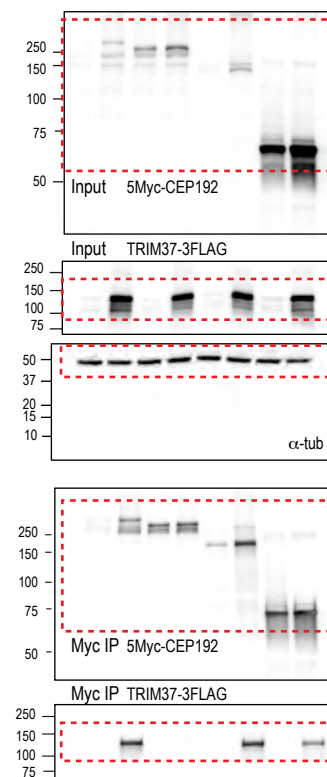

**Extended data Figure 1c (Gel 1)**

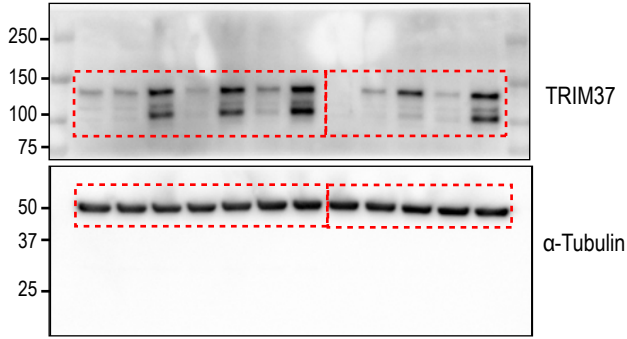

**(Gel 2)**

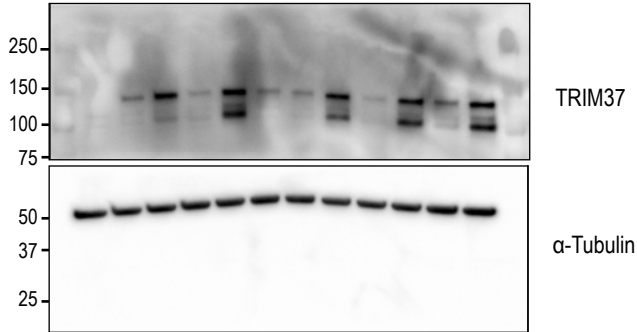

**(Gel 3 & 4)**

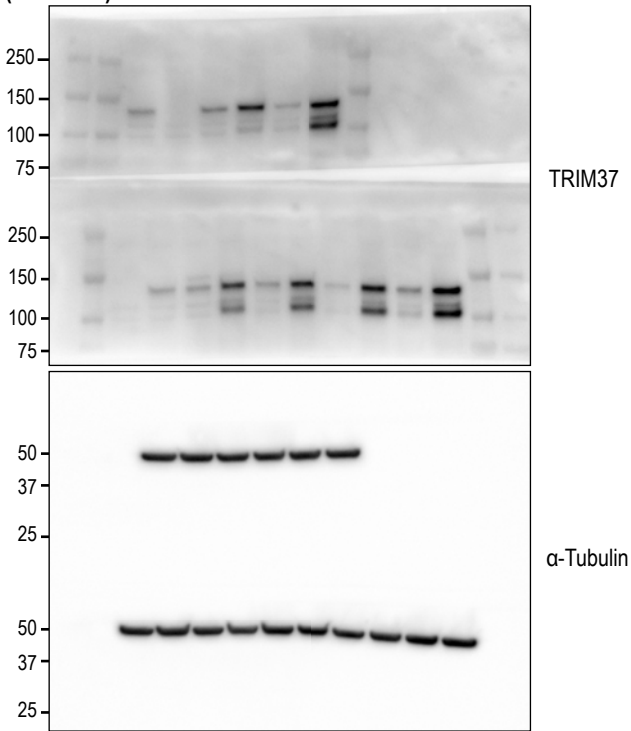

**Extended data Figure 2a(Gel 1 & 2)**

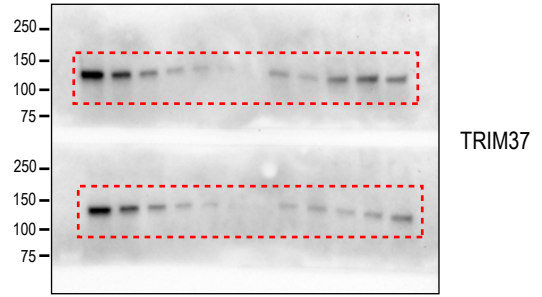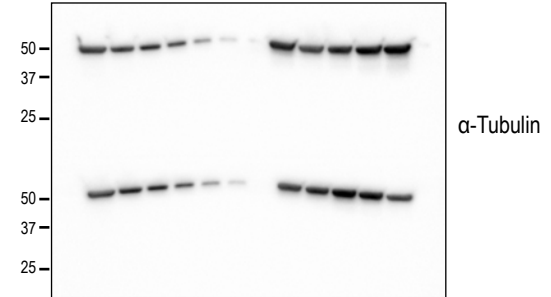

**(Gel 3 & 4)**

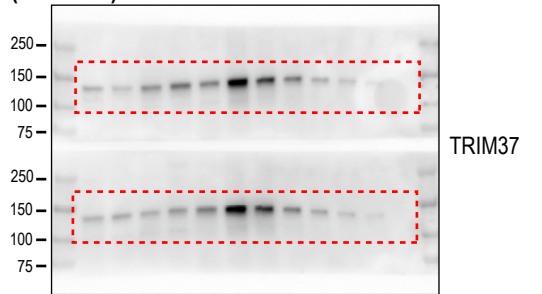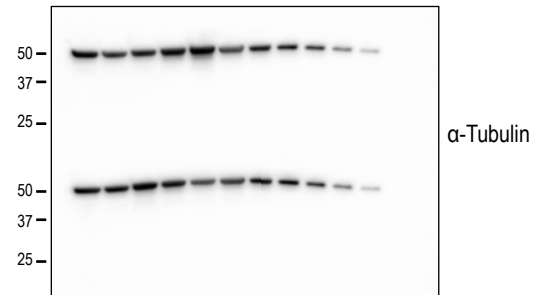

**(Gel 5 & 6)**

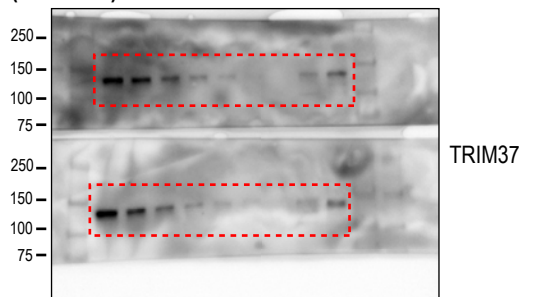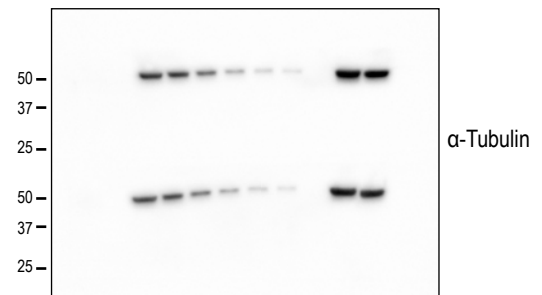

**Extended Data Figure 3b (upper panel) & Figure 2b**

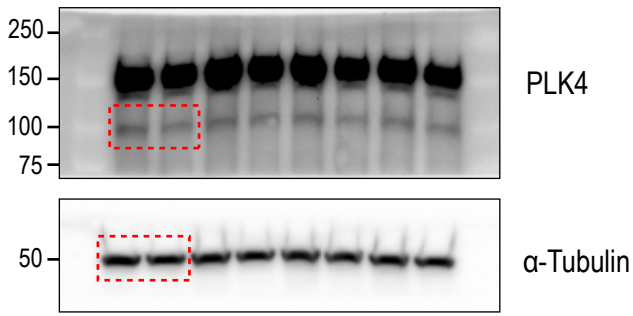

**Extended Data Figure 3b (lower panel)**

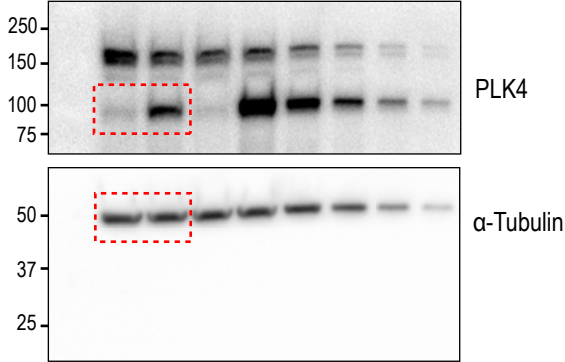

**Extended data Figure 4d**

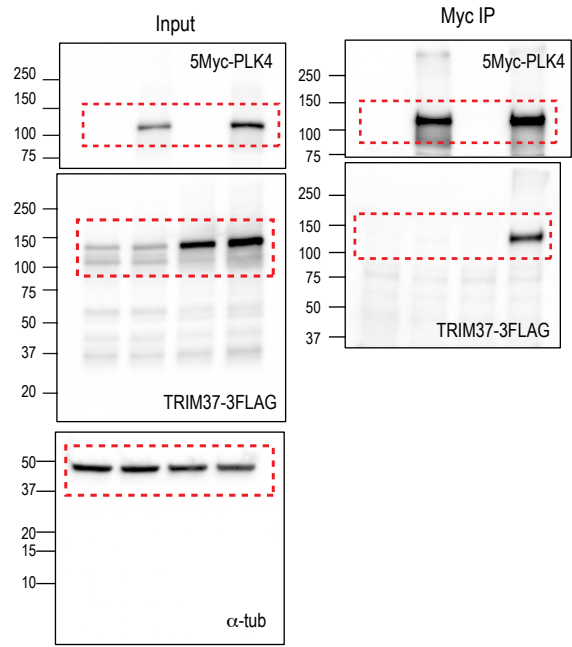

**Extended data Figure 4a**

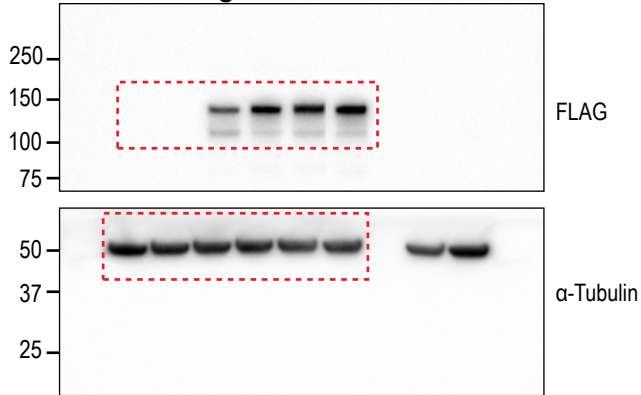

**Extended data Figure 5h (RPE1)**

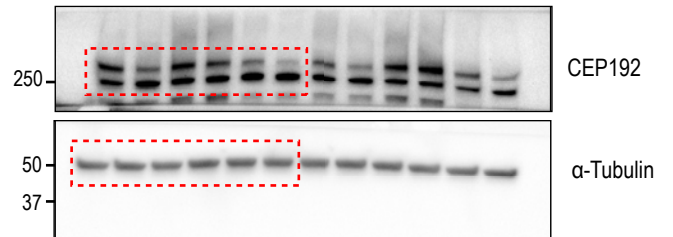

**Extended data Figure 4e**

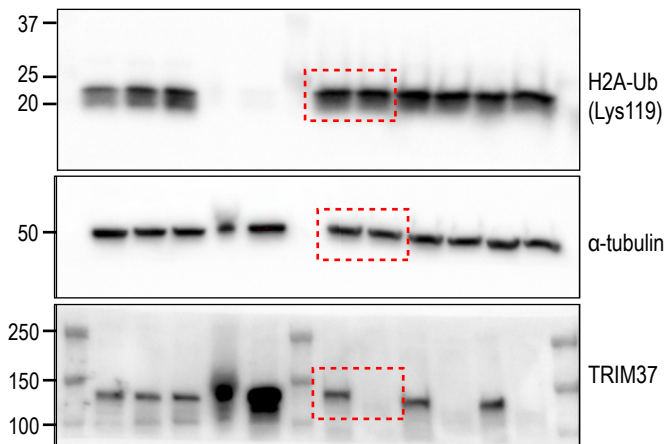

**Extended data Figure 6b**

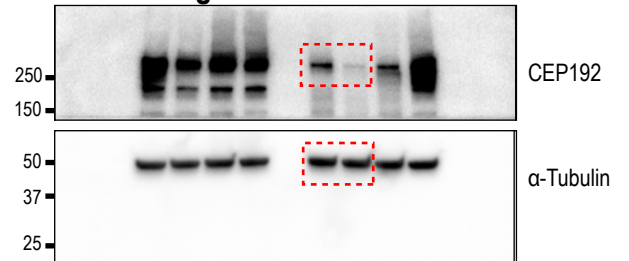

**Extended data Figure 5h (CHP134)**

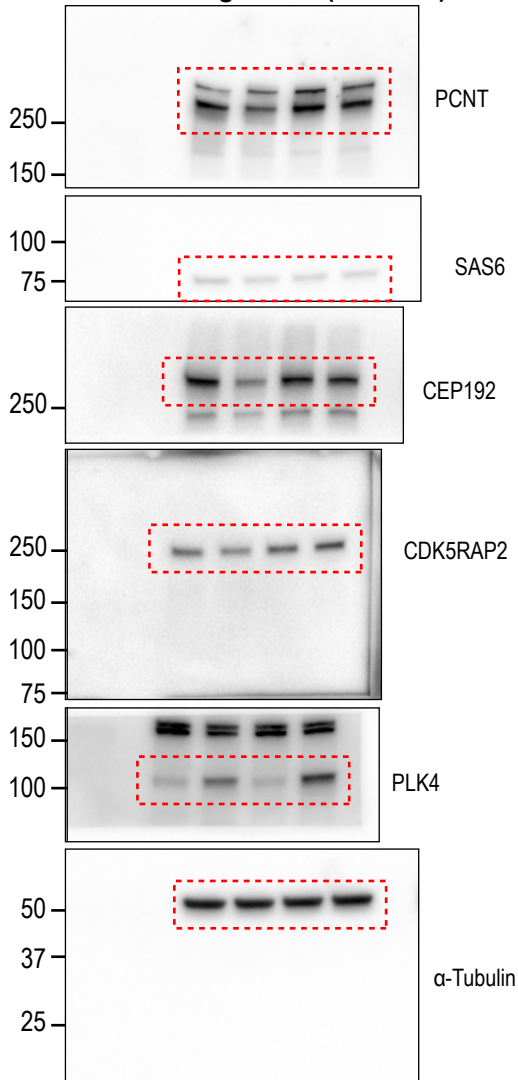

**Extended data Figure 6c**

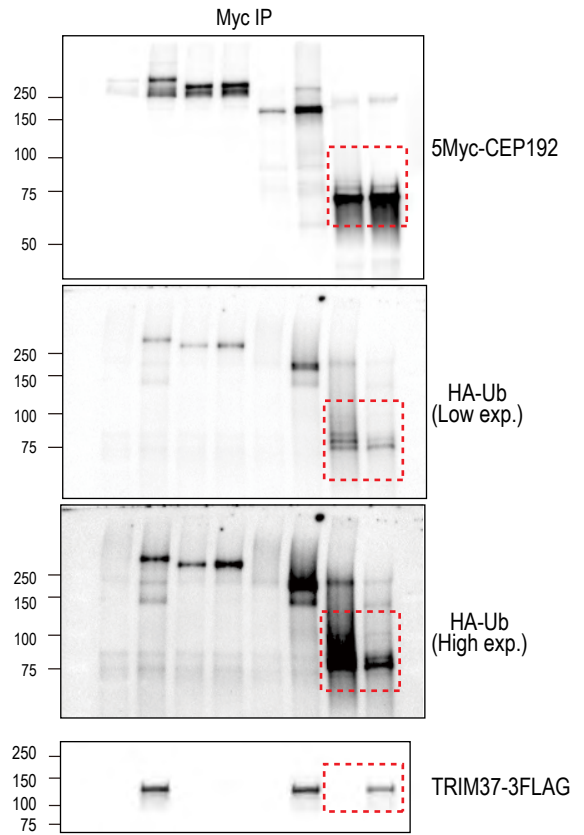

**Extended data Figure 7a**

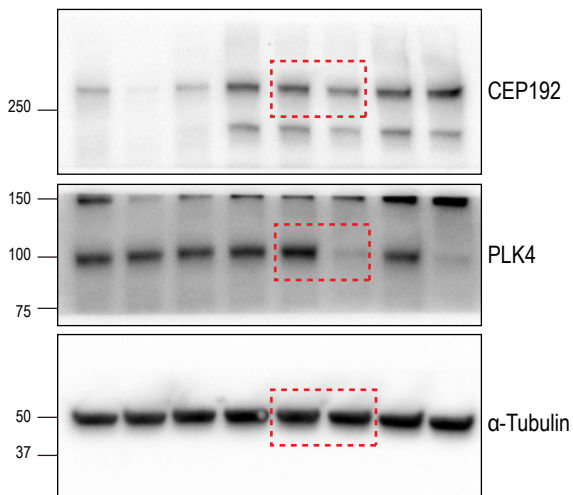

Supplement: NIHMS1602657-supplement-2.pdf [file NIHMS1602657-supplement-2.pdf]
